# Supplementary material
Source: PubMed Central journal article supplement (PMC2906334)
Supplement: supp_M110.135434_jbc.M110.135434-1.pdf [file supp_M110.135434_jbc.M110.135434-1.pdf]

## **Supplementary Online Material for**

**THE SORTASE A ENZYME THAT ATTACHES PROTEINS TO THE CELL WALL OF  
*BACILLUS ANTHRACIS* CONTAINS AN UNUSUAL ACTIVE SITE ARCHITECTURE**

Ethan M. Weiner, Scott A. Robson, Melanie Marohn, and Robert T. Clubb

**This PDF file includes:**

Figure S1

Figure S2

Figure S3

Table S1

Table S2

## Supplementary Online Material

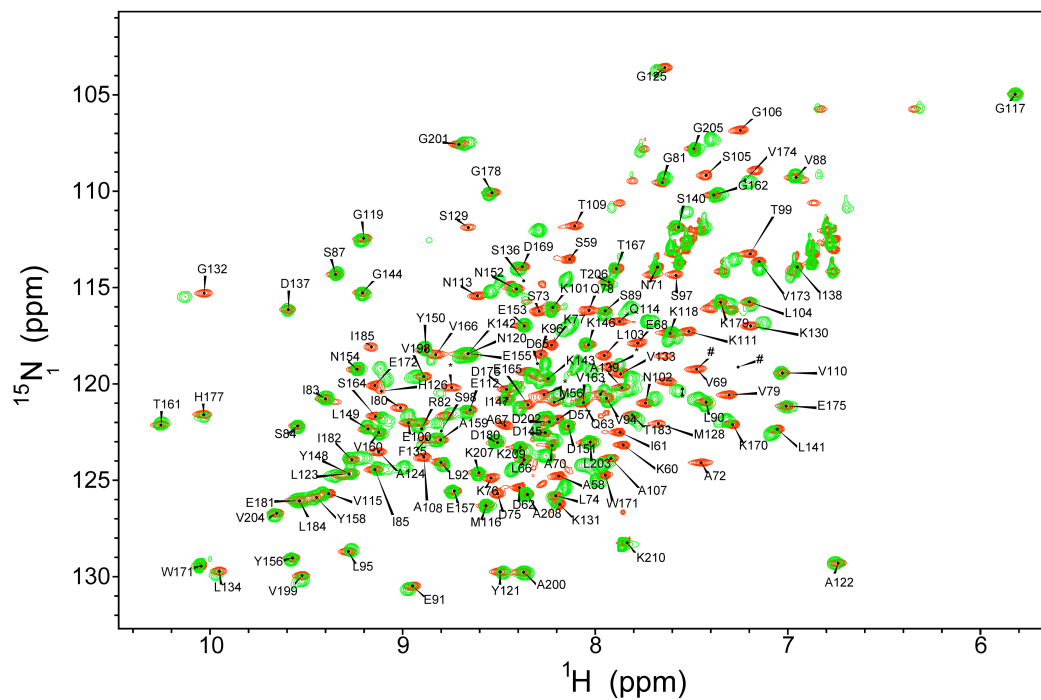

**Fig. S1:**  $^1\text{H}$ - $^{15}\text{N}$  HSQC of Ba-SrtA $_{\Delta 56}$  (red) and Ba-SrtA $_{\Delta 64}$  (green). Chemical shift assignments are taken directly from Ba-SrtA $_{\Delta 56}$ . An '\*' indicates cross peaks that could not be assigned in Ba-SrtA $_{\Delta 56}$ . A '#' indicates cross peaks that are folded into the spectra and unlikely to be backbone amides. This data shows residues Asp57-Pro64 can be deleted without significant structural disruptions.

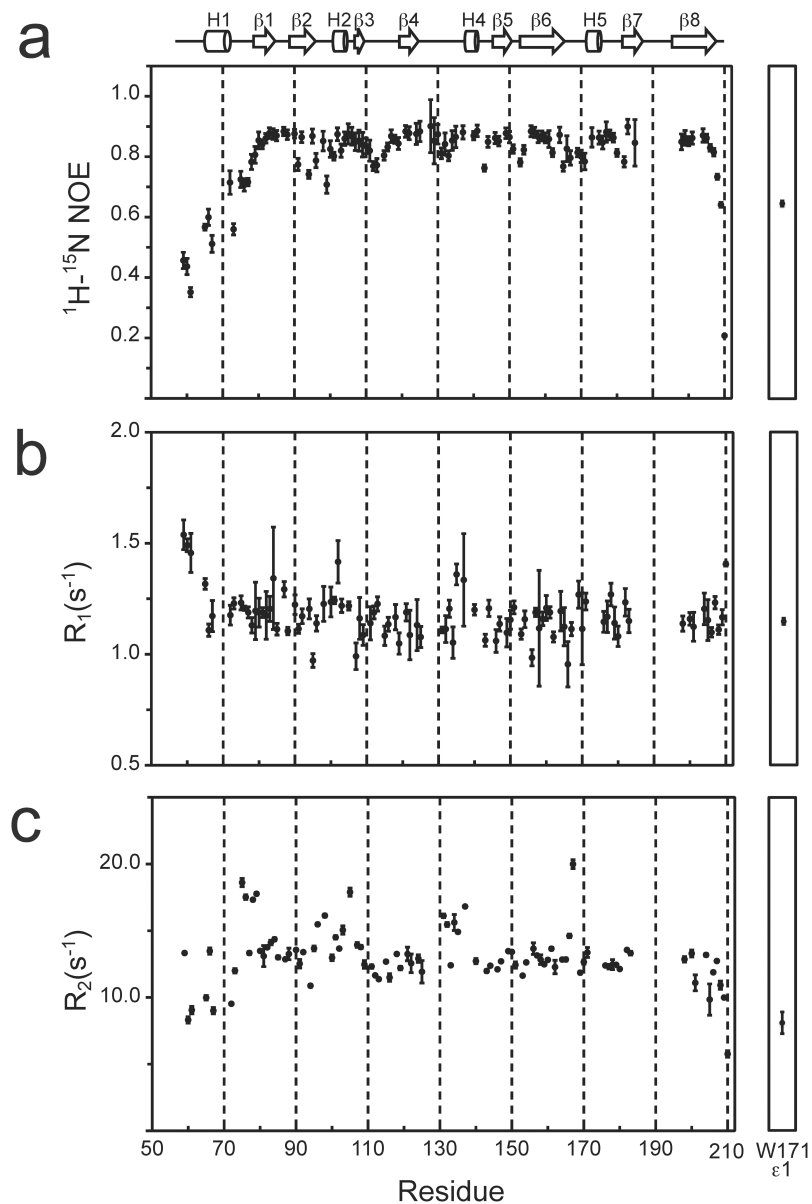

**Fig. S2:** Backbone and Trp171 N $\epsilon$ 1 side-chain amide (A)  $^1\text{H}-^{15}\text{N}$  NOE, (B)  $R_2$  and (C)  $R_1$  spin relaxation data for Ba-SrtA $\Delta_{56}$ . The right panels show data for the rp171 side chain N $\epsilon$ 1 atom. Secondary structure is displayed at the top of panel A.

## Supplementary Online Material

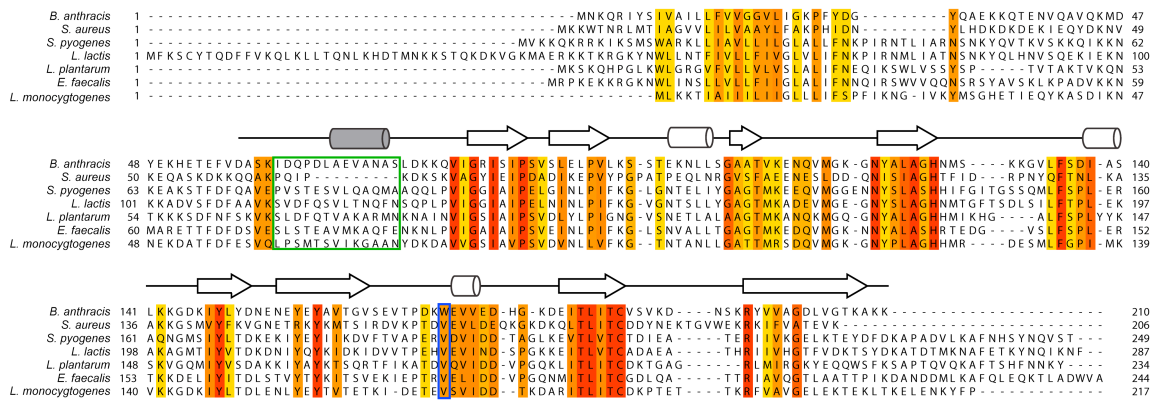**Table S1:** Model-free parameters calculated for Ba-SrtA<sub>Δ56</sub>

| Residue | Model | S <sup>2</sup> | S <sub>f</sub> <sup>2</sup> | S <sub>s</sub> <sup>2</sup> | t <sub>e</sub> | R <sub>ex</sub> |
|---------|-------|----------------|-----------------------------|-----------------------------|----------------|-----------------|
|---------|-------|----------------|-----------------------------|-----------------------------|----------------|-----------------|

## Supplementary Online Material

|     |   |               |               |               |                 |               |
|-----|---|---------------|---------------|---------------|-----------------|---------------|
| 60  | 5 | 0.495 ± 0.020 | 0.870 ± 0.016 | 0.569 ± 0.019 | 1299.4 ± 67.3   |               |
| 61  | 5 | 0.558 ± 0.024 | 0.915 ± 0.032 | 0.610 ± 0.026 | 1044.7 ± 74.2   |               |
| 65  | 5 | 0.640 ± 0.013 | 0.854 ± 0.012 | 0.750 ± 0.13  | 1265.5 ± 55.7   |               |
| 66  | 4 | 0.795 ± 0.021 |               |               | 50.8 ± 8.6      | 1.750 ± 0.404 |
| 67  | 5 | 0.580 ± 0.021 | 0.778 ± 0.026 | 0.746 ± 0.036 | 1085.2 ± 142.7  |               |
| 72  | 5 | 0.614 ± 0.014 | 0.753 ± 0.016 | 0.815 ± 0.025 | 1989.8 ± 1205.5 |               |
| 73  | 5 | 0.805 ± 0.012 | 0.913 ± 0.012 | 0.882 ± 0.013 | 596.8 ± 117.1   |               |
| 75  | 4 | 0.910 ± 0.024 |               |               | 57.4 ± 35.4     | 5.221 ± 0.488 |
| 76  | 4 | 0.888 ± 0.008 |               |               | 53.3 ± 9.2      | 4.446 ± 0.208 |
| 77  | 2 | 0.902 ± 0.007 |               |               | 55.5 ± 8.6      |               |
| 78  | 3 | 0.855 ± 0.027 |               |               |                 | 4.769 ± 0.412 |
| 79  | 3 | 0.904 ± 0.085 |               |               |                 | 4.494 ± 1.248 |
| 80  | 1 | 0.918 ± 0.003 |               |               |                 |               |
| 81  | 1 | 0.898 ± 0.015 |               |               |                 |               |
| 82  | 1 | 0.937 ± 0.005 |               |               |                 |               |
| 83  | 1 | 0.958 ± 0.011 |               |               |                 |               |
| 84  | 1 | 0.978 ± 0.008 |               |               |                 |               |
| 85  | 1 | 0.880 ± 0.007 |               |               |                 |               |
| 88  | 1 | 0.846 ± 0.012 |               |               |                 |               |
| 90  | 1 | 0.924 ± 0.004 |               |               |                 |               |
| 91  | 1 | 0.846 ± 0.013 |               |               |                 |               |
| 92  | 1 | 0.912 ± 0.002 |               |               |                 |               |
| 94  | 5 | 0.717 ± 0.010 | 0.817 ± 0.013 | 0.878 ± 0.021 | 1882.1 ± 330.5  |               |
| 95  | 3 | 0.735 ± 0.024 |               |               |                 | 2.884 ± 0.397 |
| 96  | 3 | 0.862 ± 0.027 |               |               |                 | 2.827 ± 0.409 |
| 98  | 3 | 0.928 ± 0.057 |               |               |                 | 2.510 ± 0.853 |
| 100 | 1 | 0.888 ± 0.014 |               |               |                 |               |
| 101 | 1 | 0.969 ± 0.007 |               |               |                 |               |
| 102 | 1 | 0.931 ± 0.005 |               |               |                 |               |
| 103 | 3 | 0.922 ± 0.022 |               |               |                 | 1.516 ± 0.474 |
| 105 | 3 | 0.921 ± 0.014 |               |               |                 | 4.366 ± 0.352 |
| 107 | 3 | 0.750 ± 0.046 |               |               |                 | 2.929 ± 0.686 |
| 108 | 1 | 0.937 ± 0.008 |               |               |                 |               |
| 109 | 1 | 0.843 ± 0.018 |               |               |                 |               |
| 111 | 1 | 0.839 ± 0.009 |               |               |                 |               |
| 112 | 5 | 0.779 ± 0.006 | 0.842 ± 0.009 | 0.926 ± 0.013 | 1801.8 ± 600.0  |               |
| 113 | 5 | 0.751 ± 0.014 | 0.837 ± 0.011 | 0.897 ± 0.020 | 2343.4 ± 1638.1 |               |
| 115 | 1 | 0.862 ± 0.006 |               |               |                 |               |
| 116 | 1 | 0.813 ± 0.014 |               |               |                 |               |
| 118 | 1 | 0.903 ± 0.003 |               |               |                 |               |
| 119 | 1 | 0.829 ± 0.008 |               |               |                 |               |
| 121 | 1 | 0.901 ± 0.024 |               |               |                 |               |
| 122 | 1 | 0.847 ± 0.041 |               |               |                 |               |
| 124 | 1 | 0.878 ± 0.019 |               |               |                 |               |
| 125 | 1 | 0.814 ± 0.031 |               |               |                 |               |
| 131 | 3 | 0.839 ± 0.009 |               |               |                 | 3.795 ± 0.193 |
| 132 | 3 | 0.842 ± 0.048 |               |               |                 | 3.096 ± 0.716 |
| 133 | 1 | 0.848 ± 0.006 |               |               |                 |               |

## Supplementary Online Material

|     |   |               |               |               |                |               |
|-----|---|---------------|---------------|---------------|----------------|---------------|
| 134 | 3 | 0.796 ± 0.053 |               |               |                | 3.928 ± 0.974 |
| 135 | 1 | 1.000 ± 0.003 |               |               |                |               |
| 137 | 1 | 1.000 ± 0.003 |               |               |                |               |
| 140 | 1 | 0.881 ± 0.011 |               |               |                |               |
| 143 | 2 | 0.812 ± 0.007 |               |               | 14.4 ± 2.5     |               |
| 144 | 1 | 0.844 ± 0.003 |               |               |                |               |
| 146 | 1 | 0.824 ± 0.003 |               |               |                |               |
| 147 | 1 | 0.865 ± 0.005 |               |               |                |               |
| 149 | 1 | 0.917 ± 0.002 |               |               |                |               |
| 150 | 1 | 0.913 ± 0.004 |               |               |                |               |
| 151 | 1 | 0.871 ± 0.013 |               |               |                |               |
| 153 | 2 | 0.793 ± 0.004 |               |               | 9.3 ± 2.5      |               |
| 154 | 1 | 0.860 ± 0.005 |               |               |                |               |
| 157 | 1 | 0.896 ± 0.004 |               |               |                |               |
| 158 | 1 | 0.874 ± 0.024 |               |               |                |               |
| 159 | 1 | 0.850 ± 0.002 |               |               |                |               |
| 160 | 1 | 0.873 ± 0.005 |               |               |                |               |
| 161 | 1 | 0.926 ± 0.007 |               |               |                |               |
| 162 | 1 | 0.820 ± 0.016 |               |               |                |               |
| 164 | 1 | 0.874 ± 0.003 |               |               |                |               |
| 165 | 2 | 0.873 ± 0.008 |               |               | 21.2 ± 5.9     |               |
| 166 | 3 | 0.722 ± 0.075 |               |               |                | 4.007 ± 1.105 |
| 167 | 3 | 0.842 ± 0.024 |               |               |                | 7.624 ± 0.490 |
| 169 | 1 | 0.811 ± 0.006 |               |               |                |               |
| 170 | 1 | 0.861 ± 0.011 |               |               |                |               |
| 171 | 1 | 0.922 ± 0.019 |               |               |                |               |
| 176 | 1 | 0.844 ± 0.005 |               |               |                |               |
| 177 | 1 | 0.840 ± 0.011 |               |               |                |               |
| 178 | 1 | 0.882 ± 0.021 |               |               |                |               |
| 179 | 1 | 0.848 ± 0.004 |               |               |                |               |
| 180 | 1 | 0.826 ± 0.005 |               |               |                |               |
| 182 | 1 | 0.924 ± 0.005 |               |               |                |               |
| 183 | 1 | 0.905 ± 0.009 |               |               |                |               |
| 198 | 1 | 0.872 ± 0.013 |               |               |                |               |
| 200 | 1 | 0.894 ± 0.013 |               |               |                |               |
| 201 | 1 | 0.794 ± 0.032 |               |               |                |               |
| 204 | 1 | 0.898 ± 0.007 |               |               |                |               |
| 205 | 1 | 0.786 ± 0.052 |               |               |                |               |
| 206 | 1 | 0.812 ± 0.006 |               |               |                |               |
| 207 | 1 | 0.870 ± 0.004 |               |               |                |               |
| 208 | 5 | 0.731 ± 0.025 | 0.796 ± 0.016 | 0.919 ± 0.017 | 1288.4 ± 252.4 |               |
| 209 | 5 | 0.655 ± 0.005 | 0.791 ± 0.010 | 0.828 ± 0.015 | 1274.4 ± 93.1  |               |
| 210 | 5 | 0.310 ± 0.019 | 0.790 ± 0.012 | 0.393 ± 0.019 | 1114.2 ± 19.9  |               |

**Table S2:** Intramolecular NOEs used to calculate the Ba-SrtA-LPAT\* model and corresponding intramolecular NOEs used to calculate the experimentally determined structure of Sa-SrtA-LPAT\* preveriously reported.

## Supplementary Online Material

| LPAT*           | Ba-SrtA           | Sa-SrtA           |
|-----------------|-------------------|-------------------|
| Leu-H $\alpha$  | V174-H $\gamma$   | L169-H $\delta$   |
| Leu-H $\alpha$  | I185-H $\delta$   | I182-H $\delta$   |
| Leu-H $\beta$   | P168-H $\alpha$   | P163-H $\alpha$   |
| Leu-H $\beta$   | W171-H $\alpha$   | V166-H $\alpha$   |
| Leu-H $\beta$   | V173-H $\gamma$   | V168-H $\gamma$   |
| Leu-H $\gamma$  | P168- H $\alpha$  | P163-H $\alpha$   |
| Leu-H $\gamma$  | K118-HN           | D165-HN           |
| Leu-H $\gamma$  | W171- H $\alpha$  | V166-H $\alpha$   |
| Leu-H $\gamma$  | W171-HN           | V166-HN           |
| Leu-H $\gamma$  | V173-H $\gamma$   | V168-H $\gamma$   |
| Leu-H $\gamma$  | R196-H $\gamma$   | R197-H $\gamma$   |
| Leu-H $\delta$  | P168- H $\alpha$  | P163-H $\alpha$   |
| Leu-H $\delta$  | P168-H $\beta$    | P163-H $\beta$    |
| Leu-H $\delta$  | K170-HN           | D165-HN           |
| Leu-H $\delta$  | W171- H $\alpha$  | V166-H $\alpha$   |
| Leu-H $\delta$  | W171-HN           | V166-HN           |
| Leu-H $\delta$  | E172-HN           | G167-HN           |
| Leu-H $\delta$  | V173-H $\beta$    | V168-H $\beta$    |
| Leu-H $\delta$  | V173-H $\delta$   | V168-H $\delta$   |
| Leu-H $\delta$  | R196-H $\delta$   | R197-H $\delta$   |
| Leu-H $\delta$  | R196-H $\epsilon$ | R197-H $\epsilon$ |
| Pro-H $\beta$   | V110- H $\alpha$  | A104-H $\alpha$   |
| Pro-H $\beta$   | A124-H $\beta$    | A118-H $\beta$    |
| Pro-H $\gamma$  | V110- H $\alpha$  | A104-H $\alpha$   |
| Pro-H $\gamma$  | A124-H $\beta$    | A118-H $\beta$    |
| Pro-H $\gamma$  | V174-H $\gamma$   | L169-H $\delta$   |
| Pro-H $\gamma$  | I185-H $\gamma$ 2 | I182-H $\gamma$ 2 |
| Pro-H $\gamma$  | I185-H $\delta$   | I182-H $\delta$   |
| Pro-H $\delta$  | V173-H $\gamma$   | V168-H $\gamma$   |
| Pro-H $\delta$  | V174-H $\gamma$   | L169-H $\delta$   |
| Pro-H $\delta$  | I185-H $\gamma$ 2 | I182-H $\gamma$ 2 |
| Pro-H $\delta$  | I185-H $\delta$   | I182-H $\delta$   |
| Ala- H $\alpha$ | L103-H $\delta$   | L97-H $\delta$    |
| Ala-H $\beta$   | L103-H $\delta$   | L97-H $\delta$    |
| Ala-HN          | L103-H $\delta$   | L97-H $\delta$    |

**REFERENCES:**

## Supplementary Online Material

1. Gille, C., and Frommel, C. (2001) *Bioinformatics* **17**, 377-378
2. Ilangovan, U., Ton-That, H., Iwahara, J., Schneewind, O., and Clubb, R. T. (2001) *Proc Natl Acad Sci U S A* **98**, 6056-6061
3. Race, P. R., Bentley, M. L., Melvin, J. A., Crow, A., Hughes, R. K., Smith, W. D., Sessions, R. B., Kehoe, M. A., McCafferty, D. G., and Banfield, M. J. (2009) *J Biol Chem*
4. Waterhouse, A. M., Procter, J. B., Martin, D. M., Clamp, M., and Barton, G. J. (2009) *Bioinformatics* **25**, 1189-1191
